# Supplementary material for: Metal–cyanide hybrid materials exhibiting photochromic and photomagnetic responses based on viologen receptors
Source: Royal Society of Chemistry journal article supplement (doi:10.1039/d4tc00977k), 2024-01-01
Supplement: d4tc00977k1.pdf [file d4tc00977k1.pdf]

## Supplementary Information

# Metal-Cyanide Hybrid Materials Exhibiting Photochromic and Photomagnetic Responses Based on Viologen Receptors

Hao Wang,<sup>a</sup> Teng-Da Zhou,<sup>a</sup> Ji-Tun Chen,<sup>a</sup> Han Yan,<sup>a</sup> Wen-Bin Sun<sup>a\*</sup>

**Table S1.** Crystallographic Data and Structural Refinements Parameters for **1** and **1-P**.

|                                                                                                                                                                                                                                                                                                                                                | <b>1</b>                                                                        | <b>1-P</b>                                                                      |
|------------------------------------------------------------------------------------------------------------------------------------------------------------------------------------------------------------------------------------------------------------------------------------------------------------------------------------------------|---------------------------------------------------------------------------------|---------------------------------------------------------------------------------|
| Formula                                                                                                                                                                                                                                                                                                                                        | C <sub>60</sub> H <sub>62</sub> Fe <sub>2</sub> N <sub>18</sub> O <sub>16</sub> | C <sub>60</sub> H <sub>62</sub> Fe <sub>2</sub> N <sub>18</sub> O <sub>16</sub> |
| <i>Mr</i> (g·mol <sup>-1</sup> )                                                                                                                                                                                                                                                                                                               | 1402.97                                                                         | 1402.97                                                                         |
| Temperature/K                                                                                                                                                                                                                                                                                                                                  | 298.15                                                                          | 293                                                                             |
| Space group                                                                                                                                                                                                                                                                                                                                    | P2 <sub>1</sub> / <i>n</i>                                                      | P2 <sub>1</sub> / <i>n</i>                                                      |
| Crystal system                                                                                                                                                                                                                                                                                                                                 | monoclinic                                                                      | monoclinic                                                                      |
| <i>a</i> (Å)                                                                                                                                                                                                                                                                                                                                   | 8.1707(7)                                                                       | 8.1584(2)                                                                       |
| <i>b</i> (Å)                                                                                                                                                                                                                                                                                                                                   | 11.8170(10)                                                                     | 11.8139(3)                                                                      |
| <i>c</i> (Å)                                                                                                                                                                                                                                                                                                                                   | 35.685(3)                                                                       | 35.5425(8)                                                                      |
| $\alpha$ (°)                                                                                                                                                                                                                                                                                                                                   | 90                                                                              | 90                                                                              |
| $\beta$ (°)                                                                                                                                                                                                                                                                                                                                    | 91.123(3)                                                                       | 90.982(2)                                                                       |
| $\gamma$ (°)                                                                                                                                                                                                                                                                                                                                   | 90                                                                              | 90                                                                              |
| <i>V</i> (Å <sup>3</sup> )                                                                                                                                                                                                                                                                                                                     | 3444.8(5)                                                                       | 3425.17(14)                                                                     |
| <i>Z</i>                                                                                                                                                                                                                                                                                                                                       | 2                                                                               | 2                                                                               |
| <i>F</i> (000)                                                                                                                                                                                                                                                                                                                                 | 1456.0                                                                          | 1456.0                                                                          |
| <i>D<sub>c</sub></i> (gcm <sup>-3</sup> )                                                                                                                                                                                                                                                                                                      | 1.353                                                                           | 1.360                                                                           |
| $\mu$ (mm <sup>-1</sup> )                                                                                                                                                                                                                                                                                                                      | 0.498                                                                           | 4.053                                                                           |
| <i>R</i> <sub>int</sub>                                                                                                                                                                                                                                                                                                                        | 0.0392                                                                          | 0.0947                                                                          |
| limiting indice                                                                                                                                                                                                                                                                                                                                | -10 ≤ <i>h</i> ≤ 10<br>-15 ≤ <i>k</i> ≤ 15<br>-46 ≤ <i>l</i> ≤ 46               | -9 ≤ <i>h</i> ≤ 7<br>-14 ≤ <i>k</i> ≤ 14<br>-41 ≤ <i>l</i> ≤ 42                 |
| Collected reflections                                                                                                                                                                                                                                                                                                                          | 78744                                                                           | 27658                                                                           |
| Unique reflections                                                                                                                                                                                                                                                                                                                             | 7948                                                                            | 6044                                                                            |
| GOF on <i>F</i> <sup>2</sup>                                                                                                                                                                                                                                                                                                                   | 1.057                                                                           | 1.101                                                                           |
| <i>R</i> <sub>1</sub> , <i>wR</i> <sub>2</sub> [ <i>I</i> > 2σ( <i>I</i> )]                                                                                                                                                                                                                                                                    | 0.0673 0.1984                                                                   | 0.0572 0.1562                                                                   |
| <i>R</i> <sub>1</sub> , <i>wR</i> <sub>2</sub> [all data]                                                                                                                                                                                                                                                                                      | 0.0867 0.2157                                                                   | 0.0775 0.1827                                                                   |
| <sup>a</sup> <i>R</i> <sub>1</sub> = Σ    <i>F</i> <sub>0</sub> -   <i>F</i> <sub>c</sub>    / Σ   <i>F</i> <sub>0</sub>  . <sup>b</sup> <i>wR</i> <sub>2</sub> = {Σ [w ( <i>F</i> <sub>0</sub> <sup>2</sup> - <i>F</i> <sub>c</sub> <sup>2</sup> ) <sup>2</sup> ] / Σ w( <i>F</i> <sub>0</sub> <sup>2</sup> ) <sup>2</sup> } <sup>1/2</sup> . |                                                                                 |                                                                                 |

**Table S2.** Hydrogen bonds of **1**.

| D  | H   | A                | d(D-H)/Å | d(H...A)/Å | d(D...A)/Å | ∠(DHA) |
|----|-----|------------------|----------|------------|------------|--------|
| O4 | H4  | O8 <sup>#1</sup> | 0.82     | 1.75       | 2.558(4)   | 169.9  |
| O5 | H5  | O7               | 0.82     | 1.93       | 2.676(6)   | 150.6  |
| O8 | H8C | N6 <sup>#2</sup> | 0.85     | 2.01       | 2.844(4)   | 168.4  |
| O8 | H8D | N2               | 0.85     | 1.96       | 2.812(4)   | 176.4  |
| O7 | H7A | N3 <sup>#3</sup> | 0.85     | 2.17       | 2.892(5)   | 142.1  |
| O7 | H7B | N1 <sup>#4</sup> | 0.85     | 1.92       | 2.764(4)   | 171.5  |

<sup>#1</sup>3/2-x, -1/2+y, 3/2-z; <sup>#2</sup>3/2-x, 1/2+y, 3/2-z; <sup>#3</sup>-1+x, 1+y, +z; <sup>#4</sup>+x, 1+y, +z

**Table S3.** Crystallographic Data and Structural Refinements Parameters for **2**.

| <b>2</b>                                                                                                                   |                                                                                 |
|----------------------------------------------------------------------------------------------------------------------------|---------------------------------------------------------------------------------|
| Formula                                                                                                                    | C <sub>60</sub> H <sub>62</sub> Co <sub>2</sub> N <sub>18</sub> O <sub>16</sub> |
| <i>Mr</i> (g·mol <sup>-1</sup> )                                                                                           | 1403.08                                                                         |
| Temperature/K                                                                                                              | 150                                                                             |
| Space group                                                                                                                | P2 <sub>1</sub> /n                                                              |
| Crystal system                                                                                                             | monoclinic                                                                      |
| <i>a</i> (Å)                                                                                                               | 8.0593(4)                                                                       |
| <i>b</i> (Å)                                                                                                               | 11.7604(5)                                                                      |
| <i>c</i> (Å)                                                                                                               | 35.7418(17)                                                                     |
| $\alpha$ (°)                                                                                                               | 90                                                                              |
| $\beta$ (°)                                                                                                                | 91.528(2)                                                                       |
| $\gamma$ (°)                                                                                                               | 90                                                                              |
| <i>V</i> (Å <sup>3</sup> )                                                                                                 | 3386.4(3)                                                                       |
| <i>Z</i>                                                                                                                   | 2                                                                               |
| <i>F</i> (000)                                                                                                             | 1448.0                                                                          |
| <i>D<sub>c</sub></i> (gcm <sup>-3</sup> )                                                                                  | 1.376                                                                           |
| $\mu$ (mm <sup>-1</sup> )                                                                                                  | 0.568                                                                           |
| <i>R</i> <sub>int</sub>                                                                                                    | 0.0672                                                                          |
| limiting indice                                                                                                            | -9 ≤ <i>h</i> ≤ 9<br>-14 ≤ <i>k</i> ≤ 14<br>-42 ≤ <i>l</i> ≤ 42                 |
| Collected reflections                                                                                                      | 51654                                                                           |
| Unique reflections                                                                                                         | 5950                                                                            |
| GOF on <i>F</i> <sup>2</sup>                                                                                               | 1.178                                                                           |
| <i>R</i> <sub>1</sub> , <i>wR</i> <sub>2</sub> [ <i>I</i> > 2σ( <i>I</i> )]                                                | 0.1007 0.2458                                                                   |
| <i>R</i> <sub>1</sub> , <i>wR</i> <sub>2</sub> [all data]                                                                  | 0.1089 0.2522                                                                   |
| $\sigma R_1 = \sum   F_o  -  F_c   / \sum  F_o $ . $\sigma wR_2 = \{ \sum [w(F_o^2 - F_c^2)^2] / \sum w(F_o^2)^2 \}^{1/2}$ |                                                                                 |

**Table S4.** The curves are fitted by Orbach process for complexes **1** and **1-P** under applied dc field.

| complex            | dc field         |       | $\tau_0$ (s)          | $U_{\text{eff}}/k_B$ (K) |
|--------------------|------------------|-------|-----------------------|--------------------------|
| complex <b>1</b>   | 1500 Oe dc field | Value | $6.34 \times 10^{-6}$ | 7.84                     |
| complex <b>1-P</b> | 1500 Oe dc field | Value | $1.74 \times 10^{-5}$ | 6.22                     |

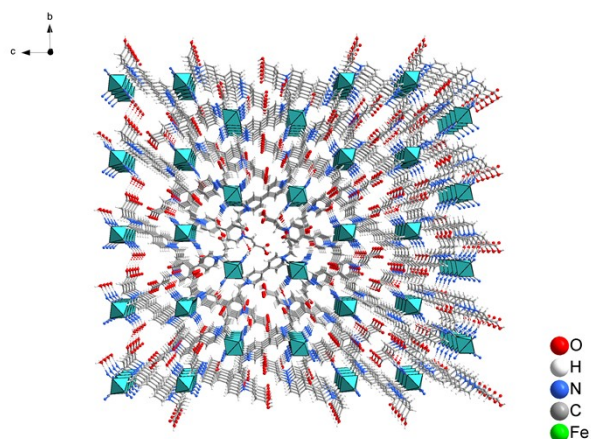

**Fig. S1** The three-dimensional (3D) supramolecular hybrid structure is constructed through the linkage of ferricyanide anions and  $\text{H}_2\text{Bpydp}^{2+}$  cations via  $\text{H}_2\text{O}$  molecules.

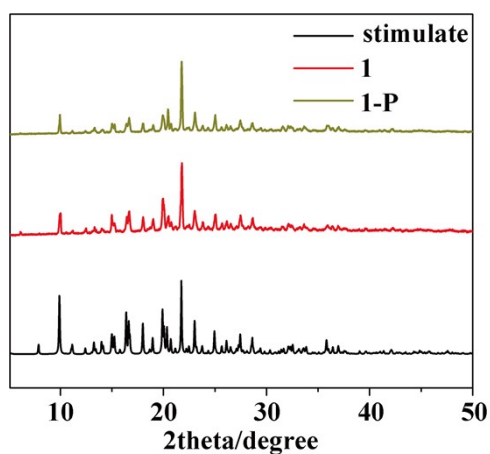

**Fig. S2** The simulated and experimental powder X-ray diffraction patterns of **1** and **1-P**.

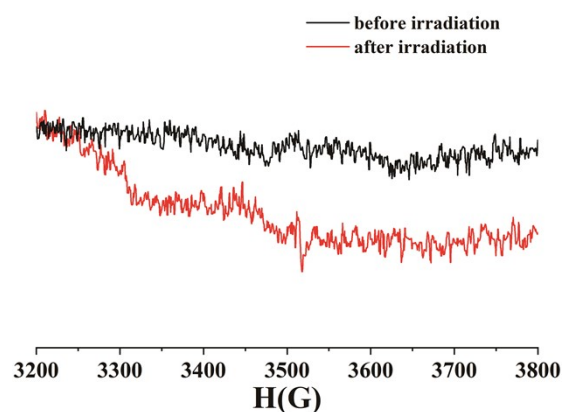

Fig. S3 ESR spectra for **1** and **1-P**.

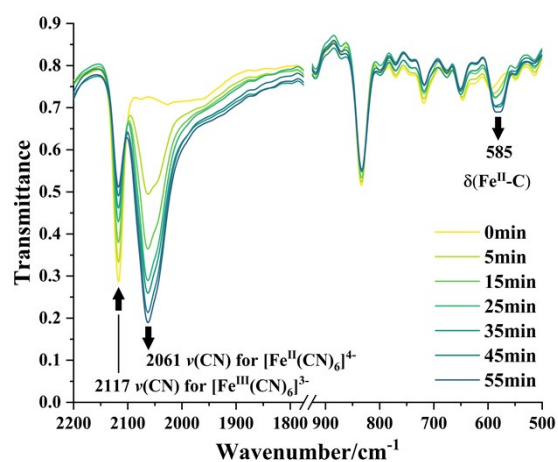

Fig. S4 Evolution of the IR spectrum of **1** in the KBr matrix upon irradiation.

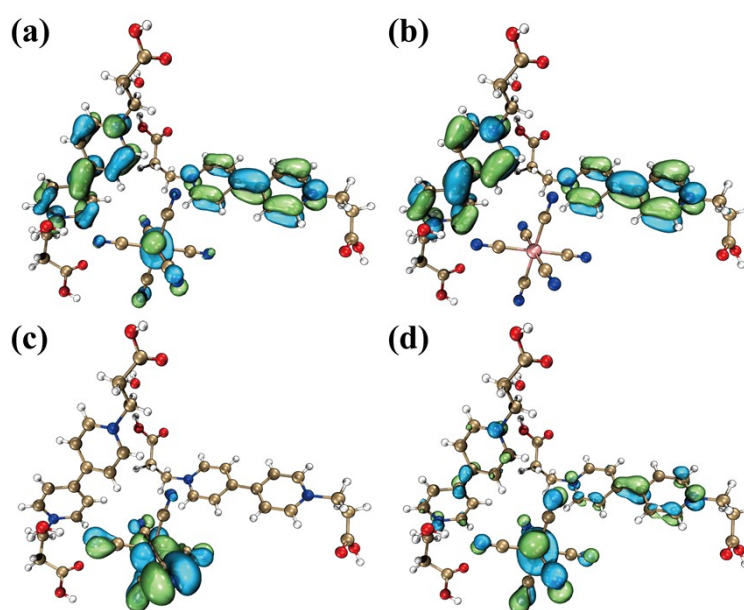

Fig. S5 HOMO (a), LUMO (b), HOMO-1 (c) and LUMO+1(d) profiles for **1**.<sup>[1, 2]</sup>

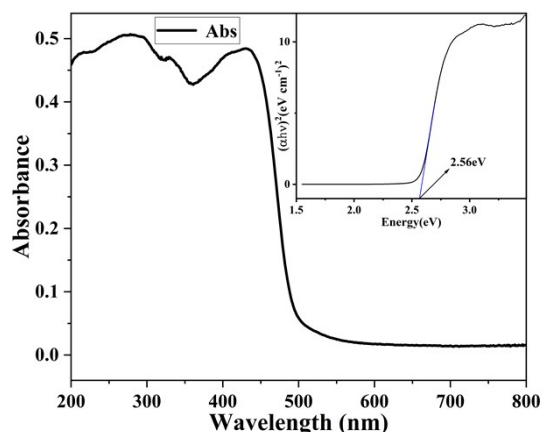

**Fig. S6** The experimental band gap, determined from solid-state UV-visible spectra via the Tauc equation.

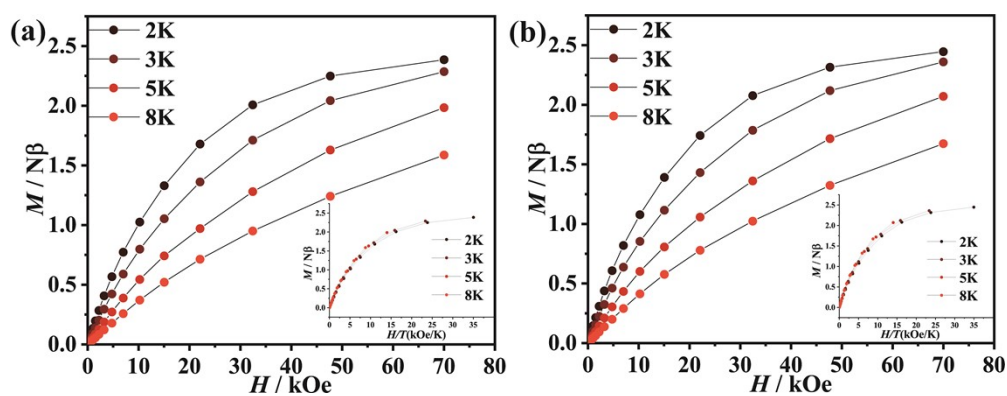

**Fig. S7** Field dependence of the magnetization between 2 and 8 K for origin sample **1** (a) and colored sample **1-P** (b).

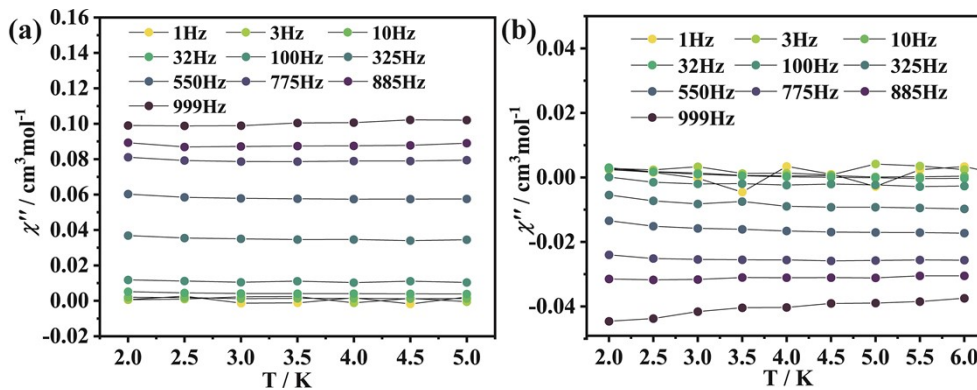

**Fig. S8** Temperature-dependent curves of out-of-phase ( $\chi''$ ) acsusceptibility at 0 Oe for **1** (a) and **1-P** (b).

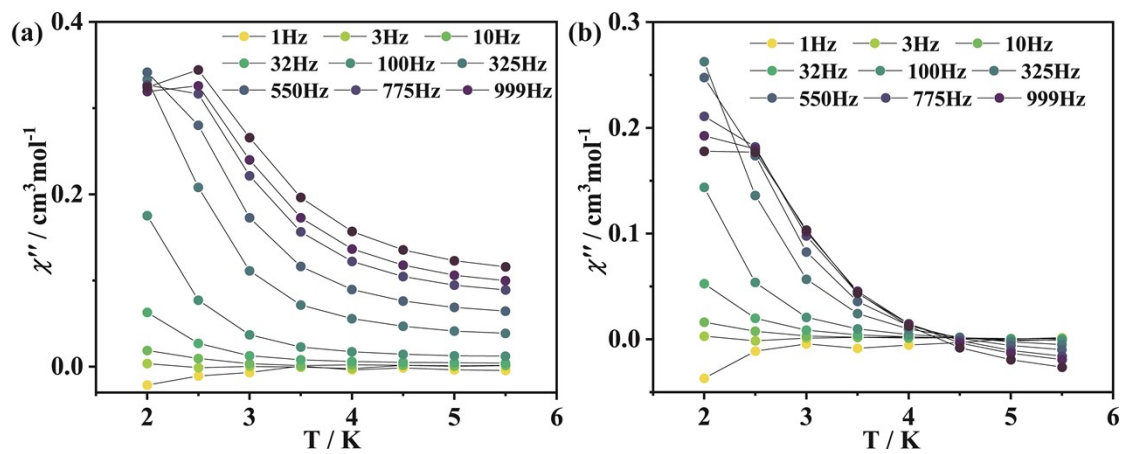

Fig. S9 Temperature-dependent curves of out-of-phase ( $\chi''$ ) acsusceptibility at 1500 Oe for **1** (a) and **1-P** (b).

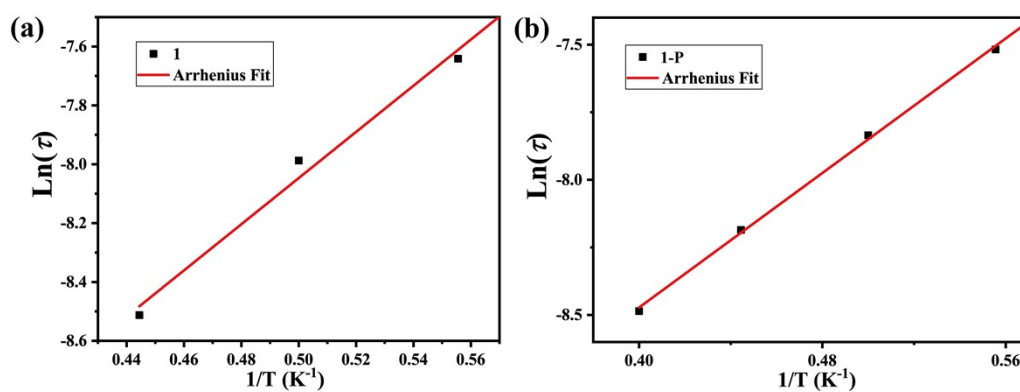

Fig. S10 Arrhenius fitting curve of the ac magnetic susceptibility of **1** (a) and **1-P** (b) under 1500 Oe.

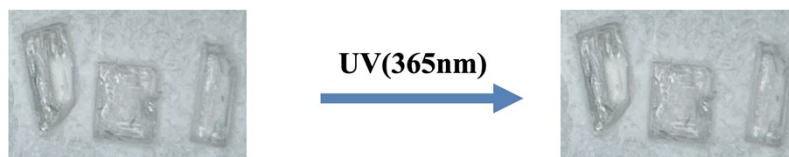

Fig. S11 The color change of **2** under UV irradiation at 365 nm.

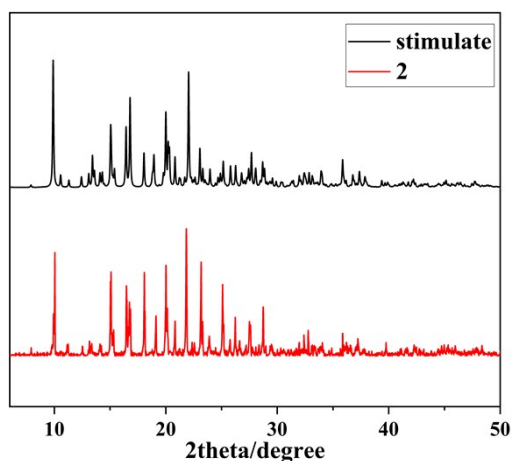

**Fig. S12** The simulated and experimental powder X-ray diffraction patterns of **2**.

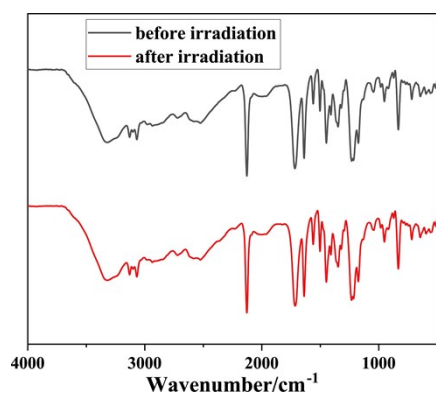

**Fig. S13** The IR spectrum of **2** in the KBr matrix upon irradiation.

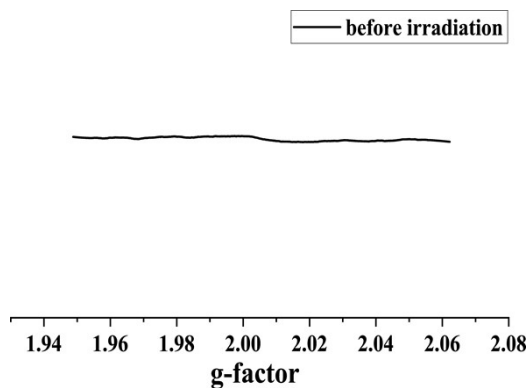

**Fig. S14** ESR spectra of **2** upon irradiation.

## References

- [1] T. Lu, F. Chen, Multiwfn: A multifunctional wavefunction analyzer, *Journal of Computational Chemistry*. 33(5) (2012) 580-592. <https://doi.org/10.1002/jcc.22885>.
- [2] W. Humphrey, A. Dalke, K. Schulten, VMD: Visual molecular dynamics, *Journal of Molecular Graphics*. 14(1) (1996) 33-38. [https://doi.org/10.1016/0263-7855\(96\)00018-5](https://doi.org/10.1016/0263-7855(96)00018-5).
